# Supplementary material for: Effects of Perioperative Magnesium Sulfate Administration on Postoperative Chronic Knee Pain in Patients Undergoing Total Knee Arthroplasty: A Retrospective Evaluation
Source: PubMed Central journal article supplement (PMC6947579; doi:10.3390/jcm8122231), 2019-12-17
Supplement: jcm-08-02231-s001.pdf [file jcm-08-02231-s001.pdf]

Table S1. Characteristics between magnesium group and control group before and after PS matching

| Variables                          | Entire cohort (n=924) |              |       | PS-matched cohort (n=321) |              |       |
|------------------------------------|-----------------------|--------------|-------|---------------------------|--------------|-------|
|                                    | Mg group              | Control      | ASD   | Mg group                  | Control      | ASD   |
|                                    | n=90                  | n=834        |       | n=89                      | n=232        |       |
| Age, year                          | 73.6 (6.1)            | 71.5 (6.1)   | 0.349 | 73.6 (6.1)                | 72.9 (5.8)   | 0.099 |
| Sex: male                          | 60 (7.2)              | 9 (10.0)     | 0.093 | 9 (10.1)                  | 22 (9.5)     | 0.019 |
| Body mass index, kg/m <sup>2</sup> | 26.9 (3.6)            | 27.0 (3.3)   | 0.036 | 26.9 (3.6)                | 26.8 (3.3)   | 0.006 |
| Type of surgery                    |                       |              | 0.168 |                           |              | 0.065 |
| Unilateral TKA                     | 417 (50.0)            | 50 (55.6)    |       | 50 (56.2)                 | 124 (53.4)   |       |
| Staged unilateral TKA              | 393 (47.1)            | 35 (38.9)    |       | 35 (39.3)                 | 102 (44.0)   |       |
| Bilateral TKA                      | 24 (2.9)              | 5 (5.6)      |       | 4 (4.5)                   | 6 (2.6)      |       |
| Preoperative ASA physical status   |                       |              | 0.070 |                           |              | 0.077 |
| 1                                  | 10 (11.1)             | 111 (13.3)   |       | 10 (11.2)                 | 33 (14.2)    |       |
| ≥ 2                                | 80 (88.9)             | 723 (86.7)   |       | 79 (88.8)                 | 199 (85.8)   |       |
| Duration of surgery, min           | 100.9 (27.4)          | 99.7 (22.8)  | 0.046 | 99.9 (25.9)               | 98.8 (24.0)  | 0.018 |
| Duration of anaesthesia, min       | 143.3 (27.4)          | 139.8 (28.8) | 0.121 | 138.9 (27.5)              | 137.4 (27.1) | 0.014 |
| Intraoperative sedation            |                       |              | 0.701 |                           |              | 0.056 |

|                               |           |            |       |           |            |       |
|-------------------------------|-----------|------------|-------|-----------|------------|-------|
| None                          | 56 (62.2) | 576 (69.1) |       | 56 (62.9) | 161 (69.4) |       |
| Propofol                      | 5 (5.6)   | 181 (21.7) |       | 5 (5.6)   | 18 (7.8)   |       |
| Dexmedetomidine               | 29 (32.2) | 77 (9.2)   |       | 28 (31.5) | 53 (22.8)  |       |
| Premedication (midazolam, mg) | 2.2 (1.0) | 2.5 (0.8)  | 0.305 | 2.2 (1.0) | 2.3 (1.0)  | 0.016 |

---

Data are presented as number (percentage) or mean (standard deviation).

ASD, absolute value of standardised mean difference; TKA, total knee arthroplasty; ASA, American Society of Anesthesiologist
